# Supplementary figures and images for: Penile Microbiota and Female Partner Bacterial Vaginosis in Rakai, Uganda
Source: PubMed Central journal article supplement — mBio. 2015 Jun 16;6(3):e00589-15. doi: 10.1128/mBio.00589-15 (PMC4471566; doi:10.1128/mbio.00589-15), 2015-06-16

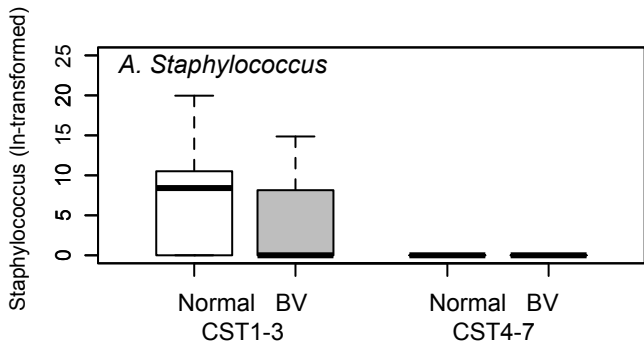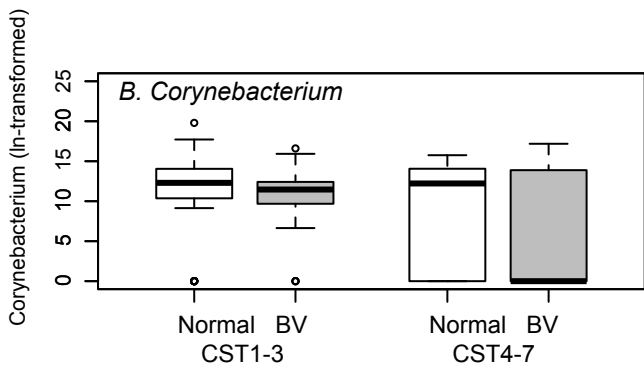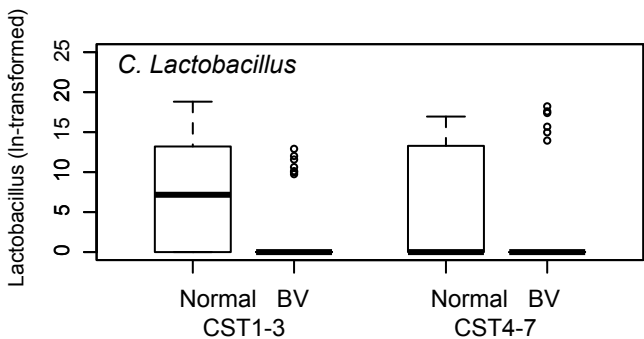

Supplement: mbo003152323sf3.pdf [file mbo003152323sf3.pdf]
